# Supplementary material for: The Effect of Ultrasound Treatment in Winemaking on the Volatile Compounds of Aglianico, Nero di Troia, and Primitivo Red Wines
Source: MDPI journal article supplement (doi:10.3390/foods12030648), 2023-02-02
Supplement: s1 [file s1]

**Table S1.** LOD and LOQ values (mg L<sup>-1</sup>) of the external calibration curves.

|           | <b>Compound</b>      | <b>LOD</b> | <b>LOQ</b> |
|-----------|----------------------|------------|------------|
| <b>1</b>  | ethyl acetate        | 0.022      | 0.074      |
| <b>2</b>  | hexanal              | 0.005      | 0.017      |
| <b>3</b>  | 2-methyl-1-propanol  | 0.023      | 0.076      |
| <b>4</b>  | 1-butanol            | 0.018      | 0.060      |
| <b>5</b>  | 2+3 methyl butanol   | 0.006      | 0.205      |
| <b>6</b>  | (E)-2-hexenal        | 0.010      | 0.033      |
| <b>7</b>  | 1-pentanol           | 0.616      | 2.052      |
| <b>8</b>  | hexyl acetate        | 0.007      | 0.025      |
| <b>9</b>  | 1-hexanol            | 0.003      | 0.010      |
| <b>10</b> | cis-3-hexen-1-ol     | 0.004      | 0.015      |
| <b>11</b> | ethyl octanoate      | 0.009      | 0.029      |
| <b>12</b> | 1-heptanol           | 0.006      | 0.020      |
| <b>13</b> | linalool             | 0.001      | 0.004      |
| <b>14</b> | isobutyric acid      | 0.060      | 0.200      |
| <b>15</b> | butyric acid         | 0.090      | 0.300      |
| <b>16</b> | isovaleric acid      | 0.020      | 0.050      |
| <b>17</b> | geranyl acetate      | 0.008      | 0.030      |
| <b>18</b> | $\beta$ -citronellol | 0.004      | 0.012      |
| <b>19</b> | nerol                | 0.005      | 0.020      |
| <b>20</b> | phenyl ethyl acetate | 0.020      | 0.070      |
| <b>21</b> | $\beta$ -damascenone | 0.020      | 0.006      |
| <b>22</b> | hexanoic acid        | 0.020      | 0.060      |
| <b>23</b> | 2-phenyl ethanol     | 0.010      | 0.050      |
| <b>24</b> | $\beta$ -ionone      | 0.003      | 0.010      |

**Table S2.** Multiple comparison test (Tukey HSD test) results considering the cultivar as independent variable.

| Multiple comparisons: Tukey HSD test |               |               |           |
|--------------------------------------|---------------|---------------|-----------|
| Dependent Variable                   | Cultivar      | Cultivar      | <i>p.</i> |
| ethyl hexanoate                      | Nero di Troia | Aglianico     | 0.002     |
|                                      |               | Primitivo     | 0.001     |
| ethyl decanoate                      | Nero di Troia | Primitivo     | 0.028     |
| diethyl succinate                    | Primitivo     | Aglianico     | 0.015     |
|                                      |               | Nero di Troia | 0.006     |
| ethyl isopentyl succinate            | Nero di Troia | Primitivo     | 0.038     |
| butyric acid                         | Nero di Troia | Primitivo     | 0.012     |
| 1-hexanol                            | Primitivo     | Aglianico     | 0.002     |
|                                      |               | Nero di Troia | 0.000     |
| cis-3-hexen-1-ol                     | Aglianico     | Nero di Troia | 0.000     |
|                                      |               | Primitivo     | 0.000     |
|                                      | Nero di Troia | Primitivo     | 0.000     |
| linalool                             | Aglianico     | Nero di Troia | 0.034     |

**Table S3.** Standardized Canonical Discriminant Function Coefficients of 14-months aged Ctr and US VOC profile of wines.

| <b>Compound</b>           | <b>Function 1</b> |
|---------------------------|-------------------|
| ethyl Acetate             | -8.192            |
| 3-methyl-1-butyl acetate  | 2.078             |
| ethyl hexanoate           | 2.852             |
| ethyl octanoate           | 1.099             |
| ethyl decanoate           | 16.619            |
| diethyl succinate         | 2.720             |
| ethyl isopentyl succinate | -8.168            |
| monoethyl succinate       | 2.843             |
| acetic acid               | -3.408            |
| isobutyric acid           | 11.847            |
| butyric acid              | -18.765           |
| isovaleric acid           | .013              |
| 1-butanol                 | -1.325            |
| 2+3 methyl Butanol        | 4.340             |
| 1-hexanol                 | -2.521            |
